# Supplementary material
Source: Royal Society of Chemistry journal article supplement (doi:10.1039/d6ce00071a)
Supplement: d6ce00071a1.pdf [file d6ce00071a1.pdf]

## **Supplementary data**

**Low-cost chrysotile-supported Cu-Ce bimetallic catalyst for efficient  
peroxymonosulfate activation: Singlet oxygen-driven dye degradation**

**Figure S1**

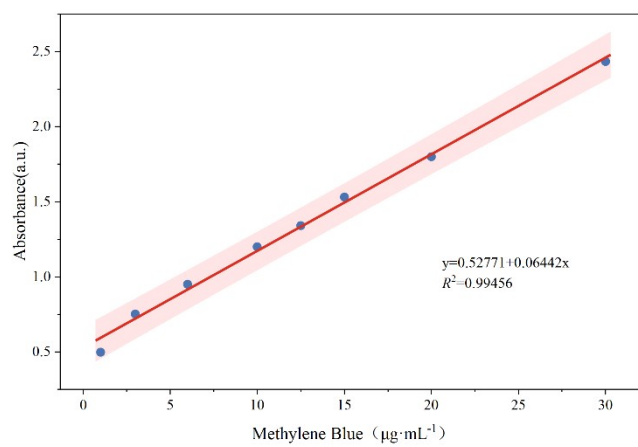

**Figure S1.** Calibration curve of MB solution at 25°C.

**Figure S2**

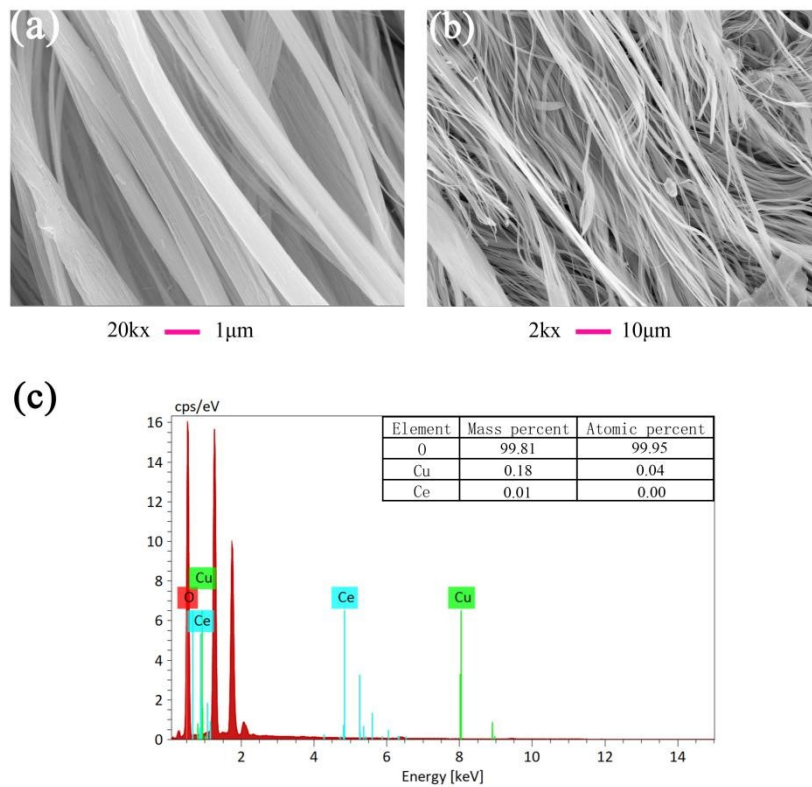

**Figure S2.** Characterization of unmodified Ser: (a-b) Representative SEM images, (c) EDS spectrum

**Figure S3**

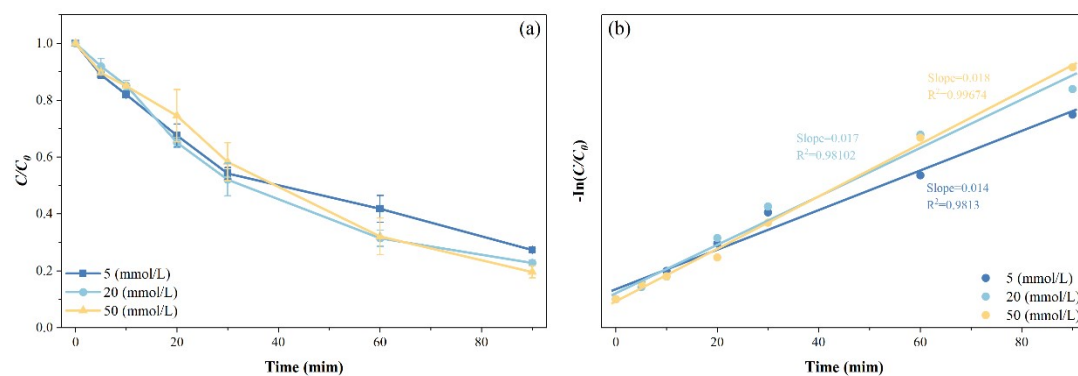

**Figure S3.** Effect of metal doping concentration on MB removal. (a) Degradation efficiency, (b) Pseudo-first-order kinetic fitting.

**Figure S4**

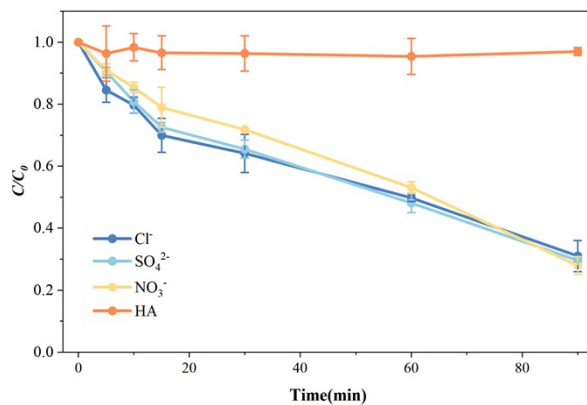

**Figure S4.** Removal of MB in the presence of 5 mmol/L coexisting ions.

**Figure S5**

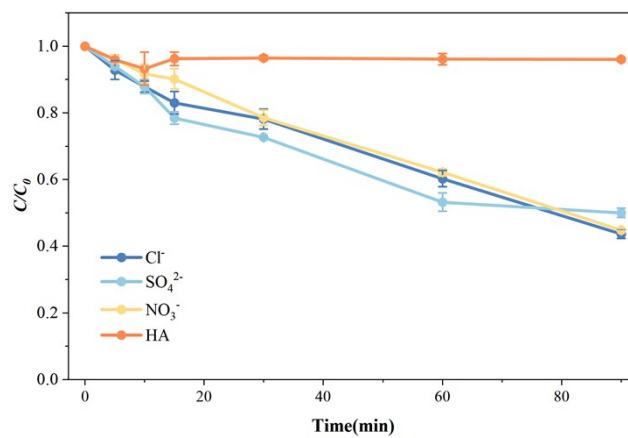

**Figure S5.** Removal of MB in the presence of 20 mmol/L coexisting ions.

**Figure S6**

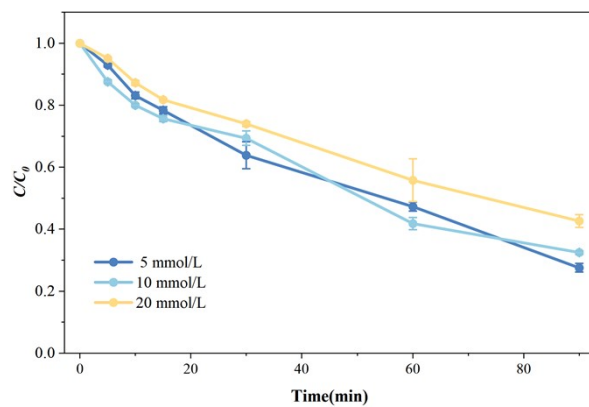

**Figure S6.** MB removal in the presence of various coexisting ions.

**Figure S7**

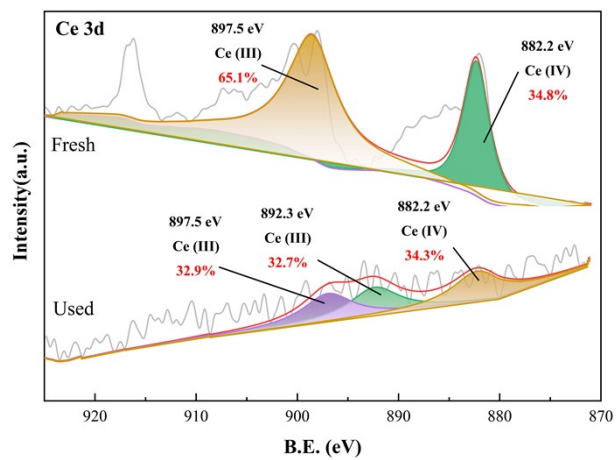

**Figure S7.** Ce 3d XPS spectra of Ser-CuCe-700 catalyst.

**Figure S8**

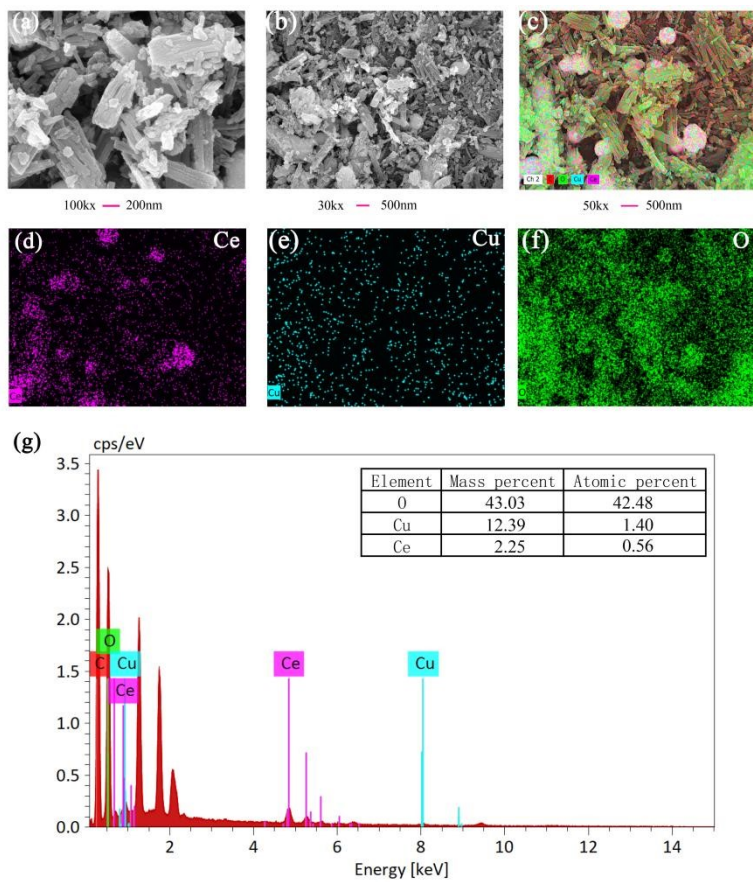

**Figure S8.** SEM and EDS of used ser-cuce-700.

**Figure S9**

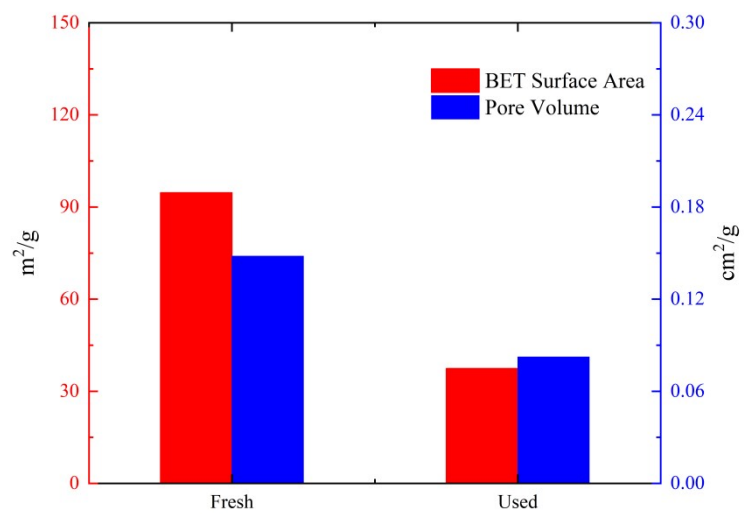

**Figure S9.** The BET test results of Ser-CuCe-700.

**Figure S10**

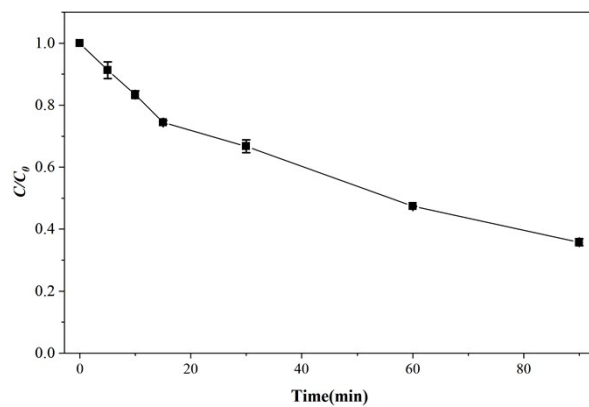

**Figure S10.** Degradation of MB by sre-700/PMS system in real water.

**Figure S11**

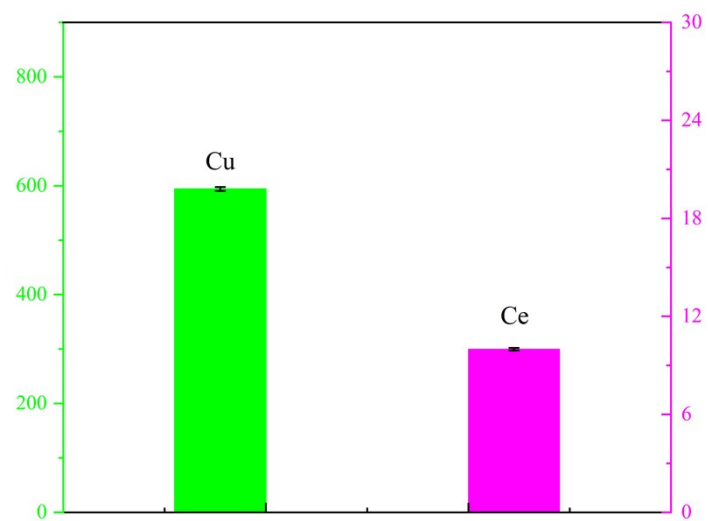

**Figure S11.** Concentration of Cu and Ce in ICP-MS test solution.

## Table S1

**Table S1.** Summary of other scholars, researches about TC removal.

| Catalyst                                                       | Concentration | Time(min) | Removal rate(%) | Rate of removal(mg·min <sup>-1</sup> ) | Source           |
|----------------------------------------------------------------|---------------|-----------|-----------------|----------------------------------------|------------------|
| Ser-CuCe-700                                                   | 20 mg/L       | 90        | 87.70           | 0.00974                                | <b>This work</b> |
| Pristine CeO <sub>2</sub>                                      | 4.6 uM        | 175       | 100             | 0.00571                                | [1]              |
| CeO <sub>2</sub>                                               | 5 mg/L        | 75        | 85              | 0.01133                                | [2]              |
| Bi <sub>2</sub> O <sub>3</sub> -Al <sub>2</sub> O <sub>3</sub> | 20 mg/L       | 80        | 70              | 0.00875                                | [3]              |
| SiO <sub>2</sub> /TiO <sub>2</sub>                             | 10 mg/L       | 300       | 75.81           | 0.00252                                | [4]              |
| BiOBr                                                          | 5 mg/L        | 60        | About 51        | 0.00850                                | [5]              |
| CuO <sub>0</sub>                                               | 10 mg/L       | 60        | 90              | 0.01500                                | [6]              |
| Co <sub>3</sub> O <sub>4</sub>                                 | 10 mg/L       | 40        | 84.06           | 0.02101                                | [7]              |

[1] Majumder D, Chakraborty I, Mandal K, et al. Facet-dependent photodegradation of methylene blue using pristine CeO<sub>2</sub> nanostructures[J]. ACS omega, 2019, 4(2): 4243-4251.

[2] Vatanparast M, Saedi L. Sonochemical-assisted synthesis and characterization of CeO<sub>2</sub> nanoparticles and its photocatalytic properties[J]. Journal of Materials Science: Materials in Electronics, 2018, 29(9): 7107-7113.

[3] Liu C B, Qian J C, Chen F, et al. Facile Synthesis of Highly Ordered Macroporous CeO<sub>2</sub> Film for Methylene Blue Degradation[C]. Materials Science Forum, 2014, 787: 41-45.

[4] Babyszko A, Wanag A, Sadłowski M, et al. Synthesis and characterization of SiO<sub>2</sub>/TiO<sub>2</sub> as photocatalyst on methylene blue degradation[J]. Catalysts, 2022, 12(11): 1372.

[5] Miao L, Hu J, Peng R, et al. Boosting organic pollutants degradation through synergistic photocatalysis and peroxy monosulfate activation by bismuth oxybromide[J]. New Journal of Chemistry, 2026, 50(10): 4471-4482.

[6] Zuo X, Jiang A, Zou S, et al. Copper oxides activate peroxymonosulfate for degradation of methylene blue via radical and nonradical pathways: surface structure and mechanism[J]. *Environmental Science and Pollution Research*, 2023, 30(5): 13023-13038.

[7] Zhang C, Liao X, Wang X, et al. Fabrication of a  $\text{Co}_3\text{O}_4$  monolithic membrane catalyst as an efficient PMS activator for the removal of methylene blue[J]. *New Journal of Chemistry*, 2023, 47(16): 7668-7677.
